# Supplementary material
Source: publisher figshare collection journal article supplement (https://acs.figshare.com/ndownloader/files/4620826)
Supplement: Supplementary file 1 [file 4620826]

### Calculation of the free polymer fraction

The used approach<sup>1s</sup> for calculating the fraction of free polymer in solution assumes that the laponite RD is composed of a certain number of sites of binding each one interacting with one polymer molecule.

$$S_t = z m_{RD} \quad (1s)$$

where  $S_t$  is the total number of interaction sites per kg of water,  $z$  is the number of moles of sites per moles of laponite RD formula unit and  $m_{RD}$  is the laponite molality calculated using the molecular weight of the laponite RD unitary cell. This model allowed<sup>1s</sup> to determine the thermodynamics of adsorption of polymers on the solid substrate. The equilibrium constant ( $K_1$ ) and the polymer mass balance are given by

$$K_1 = x_1 / [m_{P,w} (1-x_1)] \quad m_P = m_{P,w} + z x_1 m_{RD} \quad (2s)$$

where  $x_1$  is the fraction of the laponite RD site occupied by one macromolecule,  $m_P$  and  $m_{P,w}$  are the stoichiometric and the unbound polymer molalities, respectively.

By combining  $K_1$  and the polymer mass balance one may write

$$x_1 = \frac{K_1 m_{RD} z + K_1 m_P + 1 - \sqrt{(K_1 m_{RD} z)^2 + 2 K_1 m_{RD} z (1 - K_1 m_P) + (K_1 m_P)^2 + 2 K_1 m_P + 1}}{2 K_1 m_{RD} z} \quad (3s)$$

Once that  $K_1$  and  $z$  values are known,<sup>1s</sup>  $x_1$  and  $m_{P,w}$  can be computed by means of eqs 3s and 2s, respectively. From those values the fraction of unbound polymer ( $x_p$ ) and its volume fraction ( $\phi_{p,free}$ ) are given by

$$x_p = m_{P,w} / m_P \quad \phi_{p,free} = x_p \phi_p \quad (4s)$$

where  $\phi_p$  is the stoichiometric polymer volume fraction.

## Reference

1s. De Lisi, R.; Lazzara, G.; Lombardo, R.; Milioto S.; Muratore, N.; Turco Liveri M.L. *Phys. Chem. Chem. Phys.* **2005**, 7, 3994.
